# Supplementary material for: Genome-Scale Analysis of Programmed DNA Elimination Sites in Tetrahymena thermophila
Source: PubMed Central journal article supplement (PMC3276166; doi:10.1534/g3.111.000927), 2011-11-01
Supplement: supp_1.6.515_000927SI.pdf [file supp_1.6.515_000927SI.pdf]

## Files S1-S3

### Sequence Files

Files S1-S3 are available at <http://www.g3journal.org/lookup/suppl/doi:10.1534/g3.111.000927/-/DC1> or the links listed below.

Sequence File S1: reads over putative junctions of MAC-destined and MIC-specific sequence, maximally inclusive (not restricted for multi-mappers) [http://bioshare.bioinformatics.ucdavis.edu/Data/k6pd8efvnnv/all\\_windows.html](http://bioshare.bioinformatics.ucdavis.edu/Data/k6pd8efvnnv/all_windows.html)

Sequence File S2: reads aligned near MAC contig edges

[http://bioshare.bioinformatics.ucdavis.edu/Data/k6pd8efvnnv/windows\\_at\\_edges\\_of\\_contigs.html](http://bioshare.bioinformatics.ucdavis.edu/Data/k6pd8efvnnv/windows_at_edges_of_contigs.html)

Sequence File S3: non-mapper reads

[http://bioshare.bioinformatics.ucdavis.edu/Data/k6pd8efvnnv/putative\\_ies\\_seqs\\_unmapped.fasta](http://bioshare.bioinformatics.ucdavis.edu/Data/k6pd8efvnnv/putative_ies_seqs_unmapped.fasta)

**Sequence File S4: short IES sequences**

Sequence included in the SB210 MAC genome is in black, IES sequence is in blue, and directly repeated IES-flanking sequence retained in single copy at the MAC junction is in red and underlined.

**IES 1**

TTGTTACTGTGATTGTAAATTAGGAATATTTTATTAACATTTTGCATCCTAAATTTTAAGATTAGAATTCGTTTA  
ATTAGTAATCTTAATTCACATTTTAGTTTATATCATATCCTTAATTTGCCATATAATTATAATTAGTTTAACTATAA  
TTATTATCTGCATTATTAACTCTTTATTTTATTTTAAATTAATAAAAAATCACTTTTTTATTTTACAAAAATTTT  
ATATAAAATTTACATATAACGAAAAGATAAATACAAATACAAAAGCAAAATACAAAATTTTTTTGAAAAATTTATTA  
AAAAATTCATTTAATTTTAAAATTTCTTAACTTCTCCTTATTGTCGTGAAAGTGTTAATGGGTTTCGTATAACTAAG  
AATTATAATTCAAATCTTAATTAATCTAGCTCTGTTGATTATTAAGTATTAGTTGCTAGGTTTCGTTTATTAACCA  
GTAACGCATAAGGTTAACATTTTAAATTAGCATTTTGTGGTTAAAATAAGTATCATTACTGTTAGAGTTATTTTG

**IES 2**

AAAGGCGGTCGCGACATCGATGTGTTTTTATTAATTGTTGTTATTTTTATTTGTTTAGTTTTATATTTTAGAAGTCT  
CTTTGTTCTCTTCTCACACATTACGGTTTTCTTGCTTTTAGTAATAATATTTTTAGAAGATTAATTTGAAGATTA  
TCTTTATCTTTATTAACACTTCAATTAATTTCTTTTTTTATTTTATTGATTCATCATCTGAACATTA  
TTAAATAAAAATATTAATAATAAATCAATAAATAAATGCGCAAAATAAATGAATAGGTTGGTTGGTTACCTATC  
TGGTCTATTAATGGAAGTTTCTGTAATGTGAAACATTTACTGATTCGTAATCTGTATCGTGTGCTTACATTTTGA  
CAATTTGATTACAACAGTAGCATCTTTTTGTTTTTCTGTTTCTTATTTTATACTAGCTGGTTAGCTAAATTTTAT  
TTTTTCACTTAATCTTTTTTTCATCATCTTTGTCCTTGCTTTTTTGCATCTGAATTTTTCTATTAATTTTTTAAAA  
TGAAATTTTCAATTTTGAATTTTTTAAAAAATTTTTAAAAAATTAACCCCTGTTTTTTAAATTTGGTTTTGGAA  
GTGTTAATTAGGGTAATCGTTAATTAATATTTTATGAATTTACAGTATTTAACCCAGCTGTATTGGATGTCTAGTG  
AGAGTTGGCGTTCTGTAAATTTTTGTAATAAATCCATTTAAGCTAGCAGCCTGATTCAGGTTTCATGAGATTAGTAT  
TTTAAATGATACTTATGCCAGATCCATTCTGGACGTTTGCAGGAAAATTAATTTAAGGATATTTAAATGG

**IES A**

GAGATCGATAGCTATAAGAAAATGATATATGAAAGACTGGCAGTGACAAATCCGCTGAAGGTAGAAAATATGGCCAT  
GATGCAATCAATGTTCAAAATGGTTAATTAATTAATCCATTGATTATTTTAAATAGAGTTAGATTATTTCTAATACATA  
AGCTATTTTCAGAAAAATATTTCTCGAGTTAGAAATATAGACATAGTAAAAATAAGAAAATATTATTAATATAATATT  
AAAAAAAATAAAATAAATTAAAAAAAGGTTTTGAAACAGGTTTCGAACCTGATAGAAGAAAAAATAAAAAATGTTT  
AATCAAAATTTAATTTTTTTGATGAAGAAATTTAAATTTTTTACATCAAACATTTAATCTTGAATTAATTTTTTTTT  
TACATTCAAAATGAATGAAAAAAGGCTTAACCTCGAAAAATTAATGTTGATTAAAAATTTTGATTTCCCTCATCAA  
AATATTAATCTTTGATTAAACATTTTTTATTTTTTTTTGTTAGTTCAGGTTTCGAAACCTCTTTTCGATACCTTTTTTT  
ATTATTTTAAATATACATTAATTTTTTAAAAATAATTTTTATTATCTACTAAATATTTATTTCTACTACAGAAATA  
ATTATCCGAGAATAGCAATAATCTTACTCTCTGTATGAAGTAGTAATGAAGAAGAAATTAAGAACTATCTGTATG  
CTTAAATAAATTAAGCAATCTAATAATTAATCTTAAATGTATTAGCTAGGTTTGA

**IES B**

AGCAGAGAATTTACTAGATGGTTTACTCATTAACACTATCTAATCTTGATTTAAATTTTTTTGAAAAAATATTCAA  
TTTTTTAAAAAACTCTTCAAAAATCAAAAATTTTTTAAATTTTATTTAAGTAAAAAATAAATAAACTTTAAAATA  
TTTTGCTTATAAAATCTGTTAAGTAACTGACTACATTATGTATAAAGAAGATGATTAACACAAAATAATTTTATTA  
GTTAATTGGGATTTCAATTCAGAATATTCAATTTTTGATCATTAGTACATCAATATATTGAGTCTCTCGCTATT  
TTTGATTAATAATAAAAAATAAATTAATTTGAAATTAATTAAGTGTTAAATTGGATGATTAATTAATCTATCCA  
TAGGAAGAAGATGATGATGTGGAGGATTAATCTTTGAAATATGAACCTGAATTAATTAAGAAATTTGAAGAATACTT  
GTTAACGTTGTATAATGAGAAGATCCATTAGAATGCGGTTTCTGGGCTTTTTGTGCGATTATATTTATCCCATC

Sequence File S5: RT-PCR product sequences for the IES-containing *LIA2* mRNA 3' end

Unspliced mRNA:

GAGGTTTGGATGTTAAGGATGTCTCCACGTATTTAATTACGATTTCCCAAAGGTTATGGAAGACTATGTCCATAGAATCGGTAGA  
ACAGGTAGAGCTGGAGCATATGGTTGTGCAGTATCTTTCCTTACTTTTGAAAGATGATAAAAAGATATCAAGGGAATATGTC CAAAT  
GCTTCATGACGCTAAGTAAGAAATTTCCATTGATCTTCTTGATCTTGCTAGTATTAATCCAGATACAGAACTTAATATAAACTG  
TTTCTCTTCATACTATGATATTAAGAAATTTAACAGTGC TGATACTTCAAAGCCTTCAGAAGATCAGAATGTTTCAAATACTGCA  
AATAGCAGCGACAAGTACACCAGCAGTAGCAGCTACAATTAATAAAAAGCAAAAAGATGAAGATGACAAGAGAAGTAGAAGTAG  
AAGTCCATATAAACTGAAAATAACAACAGATGGGATAAATAAATCGCACAAAAGCCAGAATACCGCAGTTCTAATGGATCTT  
CTCATTATAACAACGTTAACAAGTATTCTTCAAATTCTAATAATAATTCAGTTTCATATTCAAAGAATTAATCCTCCACATCATCA  
TCTTCTTCTATGGATAGAATAATTAATCATCCAATTTAACACTTTAATTAATTTTCTTAAATTTTAAATTTTATATTTTAAATCA  
AAAATAGCGAGAGACTCAATAATATTGGTATGACTGAATGATCAAAAATGAATATTCTGAATGAAATCCCAATTAATACTAATAAA  
ATTATTTTGTGTTAATCATCTTCTTTATACATAATGTAGTCAGTTTACTTAAACAGATTTTATAAGCAAAAAAAAAAAAAAAAAA

Spliced mRNA:

GAGGTTTGGATGTTAAGGATGTCTCCACGTATTTAATTACGATTTCCCAAAGGTTATGGAAGACTATGTCCATAGAATCGGTAGA  
ACAGGTAGAGCTGGAGCATATGGTTGTGCAGTATCTTTCCTTACTTTTGAAAGATGATAAAAAGATATCAAGGGAATATGTC CAAAT  
GCTTCATGACGCTAAGTAAGAAATTTCCATTGATCTTCTTGATCTTGCTAGTATTAATCCAGATACAGAACTTAATATAAACTG  
TTTCTCTTCATACTATGATATTAAGAAATTTAACAGTGC TGATACTTCAAAGCCTTCAGAAAATCAGAATGTTTCAAATACTGCA  
AATAGCAGCGACAAGTACACCAGCAGTAGCAGCTACAATTAATAAAAAGCAAAAAGATGAAGATGACAAGAGAAGTAGAAGTAG  
AAGTCCATATAAACTGAAAATAACAACAGATGGGATAAATAAATCGCACAAAAGCCAGAATACCGCAGTTCTAATGGATCTT  
CTCATTATAACAACGTTAACAACGAGAGACTCAATAATATTGGTATGACTGAATGATCAAAAATGAATATTCTGAATGAAATCCC  
AATTAATACTAATAAAATTTTGTGTTAATCATCTTCTTTATACATAATGTAGTCAGTTTACTTAAACAGATTTTATAAGCAAAAT  
AAAAAAAAAAAAAAAAAAAAAAAAAAAA

Table S1 Primers

| Primer            | Sequence                               | Uses          |
|-------------------|----------------------------------------|---------------|
| <b>IES 1:</b>     |                                        |               |
| Win1_3369L-141    | CCAACAAAATGCTAATTTAAAATGG              | A,B           |
| Win1_3369R-62r    | TCATATCCTTAATTTGCCTCATA                | A,B           |
| Win1_3369R_junc   | GAACCCATTAACACTTTCACGA                 | B             |
| <b>IES 2:</b>     |                                        |               |
| win1_8019L-126    | CAGGCTGCTAGCTTAAATGGA                  | A,B           |
| win1_8019R-77r    | TCACACATTACGGTTTTCTTGC                 | A,B           |
| win1_8019IES+19   | TTTTTATTGATTCTCATCATCTGAAC             | B             |
| win1_8019R_junc   | CCCTAATTAACACTTCCAAAACCA               | B             |
| <b>IES 3:</b>     |                                        |               |
| win1_12075R-130   | TTGGACCTGATTATTCACCTG                  | A             |
| win1_12075L-64r   | TTGGATCCTCTATTATAACCTCCA               | A             |
| <b>IES A:</b>     |                                        |               |
| IES5_MDSL-124     | TGAAAGGCTGGCTGTGATAA                   | A,B           |
| IES5_MDSR-166     | CTGCGAATTTGCCTGAGATT                   | A             |
| IES5_JuncR1       | AGAGTAAGATTATTGCTATTCTCGGA             | B             |
| IES5_N_up         | TGGCTCTCCTTCTGTTCCAC                   | C             |
| IES_N_down        | GGCAAATTCGACGCTTCTTA                   | C             |
| <b>IES B:</b>     |                                        |               |
| IES7_MDSL-112     | GGATTGATTGGCATAAATGGA                  | A,B           |
| IES7_MDSR-158     | AAGCCCAGAATACCGCAGTTC                  | A,B,C         |
| LIA2_N_UP2        | AGTTCAAAGCGGAGAATGC                    | C             |
| Lia2_N_up2Sall    | AATTAGTCGACAGTTCAAAGCGGAGAATGCAG       | D             |
| Lia2_N_upNestSall | AATTAGTCGACGAGGTTTGGATGTTAAGGATGTC     | D             |
| <b>IES C:</b>     |                                        |               |
| IES1_MDSL-110     | TGGAAGATCTACTTCAAAGCGAAT               | A,B           |
| IES1_MDSR-31      | CCAGCTAGACACCCTGTATCAA                 | A,B           |
| IES1-MDSL-110Kpn  | ATAGGTACCTGGAAGATCTACTTCAAAGCGAAT      | A             |
| IES1-MDSR-31Apa   | ATAGGGCCAGCTAGACACCCTGTATCAA           | A             |
| IES1_N_up1619     | TTTTCTGTTGAAAAACCTTACA                 | C             |
| IES1_N_down2210r  | TCCACTTCTACCCAAAAACA                   | C             |
| IES1_N_up1619Sall | AATTAGTCGACTTTTCTGTTGAAAAACCTTACAAGTGC | D             |
| IES1_N_upNest     | GCCTCTATATGTTACAAATAGCTC               | D             |
| IES1nestIES(rev)  | GGTTGGAGATGCTATTAGCTC                  | D: No product |
| IES1nest(rev)     | CAGAAATTTACCAGCTAGACAC                 | D             |
| <b>IES D:</b>     |                                        |               |
| IES11_MDSL-42     | GGCCACAATATACTAAGGCAATTT               | A,B           |
| IES11_MDSR-34     | GGCCACCTTGATACCAATTT                   | A,B           |
| <b>IES E:</b>     |                                        |               |
| IES4_MDSL-40      | TTTCCAAAAATAAGTTTTTCATTGAG             | A             |
| IES4_MDSR-67      | CATACGTTTGAATAAGGAGGGTTT               | A,B           |
| IES4_IESL120      | GAGAAAAATGGAAATAGAGCATGA               | B             |
| <b>IES F:</b>     |                                        |               |
| IES12_MDSL-22     | CAGGGTAGCTGCCATTTCTC                   | A             |
| IES12_MDSL-359    | ATTGCTTAAGAATTCAAATAAAAAGA             | A             |
| <b>IES G:</b>     |                                        |               |
| IES2_MDSL-30      | TATCAAGCCGCTAAGCCAAG                   | A             |
| IES2_MDSR-67      | ACCTTAAAATCTTAAAATGGATGACTC            | A             |

Uses: A, MAC junction PCR; B, IES amplification; C, hybridization probe template; D, RT-PCR
