# Supplementary material for: Genome-Scale Analysis of Programmed DNA Elimination Sites in Tetrahymena thermophila
Source: PubMed Central journal article supplement (PMC3276166; doi:10.1534/g3.111.000927), 2011-11-01
Supplement: supp_1.6.515_FileS4.pdf [file supp_1.6.515_FileS4.pdf]

**Sequence File S4: short IES sequences**

Sequence included in the SB210 MAC genome is in black, IES sequence is in blue, and directly repeated IES-flanking sequence retained in single copy at the MAC junction is in red and underlined.

**IES 1**

TTGTTACTGTGATTGTAAATTAGGAATATTTTATTAACATTTTGCTATCCTAAATTTTAAGATTAGAATTCGTTTA  
ATTAGTAATCTTAATTCACATTTTAGTTTATATCATATCCTTAATTTGCCATATAATTATAATTAGTTTAACTATAA  
TTATTATCTGCATTATTAACTCTTTATTTTATTTTAAATTAATAAAAAATCACTTTTTTATTTTACAAAAATTTT  
ATATAAAATTTACATATAACGAAAAGATAAATACAAATACAAAAGCAAAATACAAAATTTTTTTGAAAAATTTATTA  
AAAAATTCATTTAATTTTAAAATTTCTTAACTTCTCCTTATTGTCGTGAAAGTGTTAATGGGTTTCGTATAACTAAG  
AATTATAATTCAAATCTTAATTAATCTAGCTCTGTTGATTATTAAGTATTAGTTGCTAGGTTTCGTTTATTAACCA  
GTAACGCATAAGGTTAACATTTTAAATTAGCATTTTGTGGTTAAAATAAGTATCATTACTGTTAGAGTTATTTTG

**IES 2**

AAAGGCGGTCGCGACATCGATGTGTTTTTATTAATTGTTGTTATTTTTATTTGTTTAGTTTTATATTTTAGAAGTCT  
CTTTGTTCTCTTCTCACACATTACGGTTTTCTTGCTTTTAGTAATAATATTTTTAGAAGATTAATTTGAAGATTA  
TCTTTATCTTTATTAACACTTCAATTAATTTCTTTTTTTATTTTATTGATTCATCATCTGAACATTTAA  
TTAAATAAAAATATTAATAATAAATCAATAAATAAATGCGCAAAATAAATGAATAGGTTGGTTGGTTACCTATC  
TGGTCTATTAATGGAAGTTTCTGTAATGTGAAACATTTACTGATTTTCGTAATCTGTATCGTGTGCTTACATTTTGA  
CAATTTGATTACAACAGTAGCATCTTTTTGTTTTTCTGTTTCTTATTTTATACTAGCTGGTTAGCTAAATTTTAT  
TTTTTCACTTAATCTTTTTTTCATCATCTTTGTCCTTGCTTTTTTGCATCTGAATTTTTCTATTAATTTTTTAAAA  
TGAAATTTTCAATTTTGAATTTTTTAAAAAATTTTTAAAAAATTAACCCCTGTTTTTTAAATTTGGTTTTGGAA  
GTGTTAATAGGGTAATCGTTAATTAATATTTTATGAATTTACAGTATTTAACCCAGCTGTATTGGATGTCTAGTG  
AGAGTTGGCGTTCTGTAAATTTTTGTAATAAATCCATTTAAGCTAGCAGCCTGATTCAGGTTTCATGAGATTAGTAT  
TTTAAATGATACTTATGCCAGATCCATTCTGGACGTTTGCAGGAAAATATTTTAAAGGATATTTAAATGG

**IES A**

GAGATCGATAGCTATAAGAAAATGATATATGAAAGACTGGCAGTGACAAATCCGCTGAAGGTAGAAAATATGGCCAT  
GATGCAATCAATGTTCAAAATGGTTAATTAATTAATCCATTGATTATTTTAAATAGAGTTAGATTATTTCTAATACATA  
AGCTATTTTCAGAAAAATATTTCTCGAGTTAGAAATATAGACATAGTAAAAATAAGAAAATATTATTAATATAATATT  
AAAAAAATAAAATAAATTAAAAAAAGGTTTTGAAACAGGTTTCGAACCTGATAGAAGAAAAAATAAAAAATGTTT  
AATCAAAATATTTAATTTTTTGGATGAAGAAATTTAAATTTTTTACATCAAACATTTAATCTTGAATTAATTTTTTTT  
TACATTCAAAATGAATGAAAAAAGGCTTAACCTCGAAAAATTAATGTTGATTAAAAATTTTGATTTCCCTCATCAA  
AATATTAATCTTTGATTAAACATTTTTTATTTTTTTTTGTTAGTTCAGGTTTCGAAACCTCTTTTCGATACCTTTTTTT  
ATTATTTTAAATATACATTAATTTTTTAAAAATAATATTTATTTCTACTAAATATTTATTTCTACTACAGAAATA  
ATTATCCGAGAATAGCAATAATCTTACTCTCTGTATGAAGTAGTAATGAAGAAGAAATATGAAACTATCTGTATG  
CTTAAATAAATTAAGCAATCTAATAATTAATCTTAAATGTATTAGCTAGGTTTGA

**IES B**

AGCAGAGAATTTACTAGATGGTTTACTCATTAACACTATCTAATCTTGATTTAAATTTTTTTGAAAAAATATTCAA  
TTTTTTAAAAAACTCTTCAAAAATCAAAAATTTTTTAAATTTTATTTAAGTAAAAAATAAATAAACTTTAAAATA  
TTTTGCTTATAAAATCTGTTAAGTAAACTGACTACATTATGTATAAAGAAGATGATTAACACAAAATAATTTTATTA  
GTTAATTTGGGATTTCAATTCAGAATATTCAATTTTTGATCATTAGTACATCAATATATTGAGTCTCTCGCTATT  
TTTGATTAATAATAAAAAATAAATTAATTTGAAATTAATTAAGTGTTAAATTGGATGATTAATTTATCTATCCA  
TAGGAAGAAGATGATGATGTGGAGGATTAATCTTTGAAATATGAACCTGAATTTATTTAGAATTTGAAGAATACTT  
GTTAACGTTGTATAATGAGAAGATCCATTAGAATGCGGTTTCTGGGCTTTTTGTGCGATTATATTTATCCCATC
