# Supplementary material for: Genome-Scale Analysis of Programmed DNA Elimination Sites in Tetrahymena thermophila
Source: PubMed Central journal article supplement (PMC3276166; doi:10.1534/g3.111.000927), 2011-11-01
Supplement: supp_1.6.515_FileS5.pdf [file supp_1.6.515_FileS5.pdf]

Sequence File S5: RT-PCR product sequences for the IES-containing *LIA2* mRNA 3' end

Unspliced mRNA:

GAGGTTTGGATGTTAAGGATGTCTCCACGTATTTAATTACGATTTCCCAAAGGTTATGGAAGACTATGTCCATAGAATCGGTAGA  
ACAGGTAGAGCTGGAGCATATGGTTGTGCAGTATCTTTCCTTACTTTTGAAAGATGATAAAAAGATATCAAGGGAATATGTC CAAAT  
GCTTCATGACGCTAAGTAAGAAATTTCCATTGATCTTCTTGATCTTGCTAGTATTAATCCAGATACAGAACTTAATATAAACTG  
TTTCTCTTCATACTATGATATTAAGAAATTTAACAGTGC TGATACTTCAAAGCCTTCAGAAGATCAGAATGTTTCAAATACTGCA  
AATAGCAGCGACAAGTACACCAGCAGTAGCAGCTACAATTAATAAAAAGCAAAAAGATGAAGATGACAAGAGAAGTAGAAGTAG  
AAGTCCATATAAACTGAAAATAACAACAGATGGGATAAATAATCGCACAAAAGCCAGAATACCGCAGTTCTAATGGATCTT  
CTCATTATAACAACGTTAACAAGTATTCTTCAAATTCTAATAATAATTCAGTTTCATATTCAAAGAATTAATCCTCCACATCATCA  
TCTTCTTCTATGGATAGAATAATTAATCATCCAATTTAACACTTTAATTAATTTTCTTAAATTTTAAATTTTATATTTTAAATCA  
AAAATAGCGAGAGACTCAATAATATTGGTATGACTGAATGATCAAAAATGAATATTCTGAATGAAATCCCAATTAATACTAATAAA  
ATTATTTTGTGTTAATCATCTTCTTTATACATAATGTAGTCAGTTTACTTAAACAGATTTTATAAGCAAAAAAAAAAAAAAAAA

Spliced mRNA:

GAGGTTTGGATGTTAAGGATGTCTCCACGTATTTAATTACGATTTCCCAAAGGTTATGGAAGACTATGTCCATAGAATCGGTAGA  
ACAGGTAGAGCTGGAGCATATGGTTGTGCAGTATCTTTCCTTACTTTTGAAAGATGATAAAAAGATATCAAGGGAATATGTC CAAAT  
GCTTCATGACGCTAAGTAAGAAATTTCCATTGATCTTCTTGATCTTGCTAGTATTAATCCAGATACAGAACTTAATATAAACTG  
TTTCTCTTCATACTATGATATTAAGAAATTTAACAGTGC TGATACTTCAAAGCCTTCAGAAAATCAGAATGTTTCAAATACTGCA  
AATAGCAGCGACAAGTACACCAGCAGTAGCAGCTACAATTAATAAAAAGCAAAAAGATGAAGATGACAAGAGAAGTAGAAGTAG  
AAGTCCATATAAACTGAAAATAACAACAGATGGGATAAATAATCGCACAAAAGCCAGAATACCGCAGTTCTAATGGATCTT  
CTCATTATAACAACGTTAACAACGAGAGACTCAATAATATTGGTATGACTGAATGATCAAAAATGAATATTCTGAATGAAATCCC  
AATTAATACTAATAAAATATTTTGTGTTAATCATCTTCTTTATACATAATGTAGTCAGTTTACTTAAACAGATTTTATAAGCAAAAT  
AAAAAAAAAAAAAAAAAAAAAAAAAAAA
