# Supplementary material for: Genome-Scale Analysis of Programmed DNA Elimination Sites in Tetrahymena thermophila
Source: PubMed Central journal article supplement (PMC3276166; doi:10.1534/g3.111.000927), 2011-11-01
Supplement: supp_1.6.515_TableS1.pdf [file supp_1.6.515_TableS1.pdf]

Table S1 Primers

| Primer            | Sequence                               | Uses          |
|-------------------|----------------------------------------|---------------|
| <b>IES 1:</b>     |                                        |               |
| Win1_3369L-141    | CCAACAAAATGCTAATTTAAAATGG              | A,B           |
| Win1_3369R-62r    | TCATATCCTTAATTTGCCTCATA                | A,B           |
| Win1_3369R_junc   | GAACCCATTAACACTTTTCACGA                | B             |
| <b>IES 2:</b>     |                                        |               |
| win1_8019L-126    | CAGGCTGCTAGCTTAAATGGA                  | A,B           |
| win1_8019R-77r    | TCACACATTACGGTTTTCTTGC                 | A,B           |
| win1_8019IES+19   | TTTTTATTGATTCTCATCATCTGAAC             | B             |
| win1_8019R_junc   | CCCTAATTAACACTTCCAAAACCA               | B             |
| <b>IES 3:</b>     |                                        |               |
| win1_12075R-130   | TTGGACCTGATTATTCACCTG                  | A             |
| win1_12075L-64r   | TTGGATCCTCTATTATAACCTCCA               | A             |
| <b>IES A:</b>     |                                        |               |
| IES5_MDSL-124     | TGAAAGGCTGGCTGTGATAA                   | A,B           |
| IES5_MDSR-166     | CTGCGAATTTGCCTGAGATT                   | A             |
| IES5_JuncR1       | AGAGTAAGATTATTGCTATTCTCGGA             | B             |
| IES5_N_up         | TGGCTCTCCTTCTGTTCCAC                   | C             |
| IES_N_down        | GGCAAATTCGAGCTTCTTA                    | C             |
| <b>IES B:</b>     |                                        |               |
| IES7_MDSL-112     | GGATTGATTGGCATAAATGGA                  | A,B           |
| IES7_MDSR-158     | AAGCCCAGAATACCGCAGTTC                  | A,B,C         |
| LIA2_N_UP2        | AGTTCAAAGCGGAGAATGC                    | C             |
| Lia2_N_up2Sall    | AATTAGTCGACAGTTCAAAGCGGAGAATGCAG       | D             |
| Lia2_N_upNestSall | AATTAGTCGACGAGGTTTGGATGTTAAGGATGTC     | D             |
| <b>IES C:</b>     |                                        |               |
| IES1_MDSL-110     | TGGAAGATCTACTTCAAAGCGAAT               | A,B           |
| IES1_MDSR-31      | CCAGCTAGACACCCTGTATCAA                 | A,B           |
| IES1-MDSL-110Kpn  | ATAGGTACCTGGAAGATCTACTTCAAAGCGAAT      | A             |
| IES1-MDSR-31Apa   | ATAGGGCCCAGCTAGACACCCTGTATCAA          | A             |
| IES1_N_up1619     | TTTTCTGTTGAAAAACCTTACA                 | C             |
| IES1_N_down2210r  | TCCACTTTCTACCCAAAAACA                  | C             |
| IES1_N_up1619Sall | AATTAGTCGACTTTTCTGTTGAAAAACCTTACAAGTGC | D             |
| IES1_N_upNest     | GCCTCTATATGTTACAAATAGCTC               | D             |
| IES1nestIES(rev)  | GGTTGGAGATGCTATTAGCTC                  | D: No product |
| IES1nest(rev)     | CAGAAATTTACCAGCTAGACAC                 | D             |
| <b>IES D:</b>     |                                        |               |
| IES11_MDSL-42     | GGCCACAATATACTAAGGCAATTT               | A,B           |
| IES11_MDSR-34     | GGCCACCTTGATACCAATTT                   | A,B           |
| <b>IES E:</b>     |                                        |               |
| IES4_MDSL-40      | TTTCCAAAAATAAGTTTTTCATTGAG             | A             |
| IES4_MDSR-67      | CATACGTTTGAATAAGGAGGGTTT               | A,B           |
| IES4_IESL120      | GAGAAAAATGGAAATAGAGCATGA               | B             |
| <b>IES F:</b>     |                                        |               |
| IES12_MDSL-22     | CAGGGTAGCTGCCATTTCTC                   | A             |
| IES12_MDSL-359    | ATTGCTTAAGAATTCAAATAAAAAGA             | A             |
| <b>IES G:</b>     |                                        |               |
| IES2_MDSL-30      | TATCAAGCCGCTAAGCCAAG                   | A             |
| IES2_MDSR-67      | ACCTTAAAATCTTAAAATGGATGACTC            | A             |

Uses: A, MAC junction PCR; B, IES amplification; C, hybridization probe template; D, RT-PCR
